# Supplementary material for: Ocean alkalinity enhancement in an open ocean ecosystem: Biogeochemical responses and carbon storage durability
Source: Copernicus journal article supplement (doi:10.5194/egusphere-2024-417), 2024-03-04

## **Contents**

Table S1: Overview on linear regression analyses

Table S2: Carbonate chemistry treatment and phase means

Table S3: Overview of data included in Fig. 8 in manuscript

Figure S1: Photo of mesocosm set up at pier

Figure S2: Photo of white particles attached to mesocosm walls in OAE2400

Figure S3: FTIR spectrum of mesocosm precipitates and calcite/aragonite standard materials

Figure S4: Long-term changes in alkalinity (TA) and aragonite saturation state ( $\Omega_{ar}$ ) from extended incubations

Table S1: Overview on linear regression analyses for all variables included in the summary table (Table 1) in the main manuscript. Phase 0 refers to before alkalinity addition, Phase I corresponds to Days 7-19 (short-term response), and Phase II corresponds to Days 21-33 (longer-term response). Bold data indicate significant positive impact of OAE detected, and italics indicates significant negative impact of OAE was detected.

| Group of variables                        | Variable                                             | Phase  | F-Statistic (df = 7) | p value       | Multiple R <sup>2</sup> | Estimate (intercept) | Estimate (x-coefficient) | Data transformation |
|-------------------------------------------|------------------------------------------------------|--------|----------------------|---------------|-------------------------|----------------------|--------------------------|---------------------|
| nutrients                                 | Nitrate + nitrite [NO <sub>x</sub> ]                 | 0      | 0.975                | 0.3563        |                         | -0.9211              | 0.0001                   | none                |
|                                           |                                                      | I      | 0.204                | 0.6655        | 0.028                   | -0.0667              | 0.0000                   | none                |
|                                           |                                                      | II     | 2.10                 | 0.1275        | 0.299                   | -0.0331              | 0.0000                   | log(y + 1)          |
|                                           | Inorganic phosphate [PO <sub>4</sub> <sup>3-</sup> ] | 0      | 1.54                 | 0.2548        |                         | 0.1383               | 0.0000                   | none                |
|                                           |                                                      | I      | 0.123                | 0.7357        | 0.017                   | 0.0454               | 0.0000                   | log(y + 1)          |
|                                           |                                                      | II     | 3.56                 | 0.1012        | 0.337                   | 0.0438               | 0.0000                   | none                |
| Dissolved silicate [Si(OH) <sub>4</sub> ] | 0                                                    | 5.337  | 0.0537               |               | 0.4067                  | 0.0000               | log(y + 1)               |                     |
|                                           | I                                                    | 1.64   | 0.2416               | 0.189         | 0.2233                  | 0.0000               | log(y + 1)               |                     |
|                                           | II                                                   | 0.096  | 0.7662               | 0.057         | 0.2626                  | 0.0000               | log(y + 1)               |                     |
| POM                                       | Chl a                                                | 0      | 0.375                | 0.5594        |                         | 2.4030               | 0.0000                   | log(y)              |
|                                           |                                                      | I      | 1.58                 | 0.2487        | 0.184                   | 13.6721              | -0.0003                  | <sup>2</sup> √(y+1) |
|                                           |                                                      | II     | 0.269                | 0.6199        | 0.037                   | 7.1817               | 0.0005                   | <sup>3</sup> √(y+1) |
|                                           | POC                                                  | 0      | 0.295                | 0.6040        |                         | 89.7057              | -0.0024                  | none                |
|                                           |                                                      | I      | 4.82                 | 0.0642        | 0.408                   | 76.1748              | -0.0042                  | none                |
|                                           | II                                                   | 0.009  | 0.9262               | 0.001         | 4.3100                  | 0.0000               | <sup>3</sup> √(y+1)      |                     |
|                                           | PON                                                  | 0      | 1.12                 | 0.3100        |                         | 1.1570               | 0.0000                   | none                |
|                                           |                                                      | I      | 11.3                 | 0.0121        | 0.617                   | 11.8449              | -0.0009                  | none                |
|                                           | II                                                   | 0.099  | 0.7620               | 0.014         | 1.1460                  | 0.0000               | log(y)                   |                     |
|                                           | POP                                                  | 0      | 3.33                 | 0.1109        | 0.322                   | 0.0000               | 0.0000                   | y <sup>4</sup>      |
| I                                         |                                                      | 3.24   | 0.1151               | 0.316         | 0.0000                  | 0.0000               | y <sup>4</sup>           |                     |
| II                                        | 0.041                                                | 0.8452 | 0.006                | 0.0027        | 0.0000                  | 0.0000               | y <sup>2</sup>           |                     |
| POM stoichiometry                         | POC:PON                                              | 0      | 0.514                | 0.4965        |                         | 6.2026               | 0.0002                   | none                |
|                                           |                                                      | I      | 3.52                 | 0.1027        | 0.335                   | 6.3983               |                          | none                |
|                                           |                                                      | II     | <b>62.1</b>          | <b>0.0001</b> | <b>0.899</b>            | <b>5.5810</b>        | <b>0.0005</b>            | <b>none</b>         |
|                                           | POC:POP                                              | 0      | 1.685                | 0.2354        | 0.194                   | 160.5000             | 0.0053                   | none                |
|                                           |                                                      | I      | 0.717                | 0.4252        | 0.093                   | 161.5000             | 0.0026                   | none                |
|                                           | II                                                   | 0.434  | 0.5308               | 0.058         | 134.3000                | 0.0065               | none                     |                     |
|                                           | PON:POP                                              | 0      | 0.829                | 0.4136        | 0.097                   | 19.8492              | 0.0011                   | none                |
|                                           |                                                      | I      | 0.022                | 0.7535        | 0.015                   | 21.7250              | -0.0002                  | none                |
|                                           | II                                                   | 0.030  | 0.8201               | 0.008         | 20.2446                 | -0.0003              | none                     |                     |
|                                           | PON:BSi                                              | 0      | 1.91                 | 0.2090        |                         | 0.0191               | 0.0000                   | 1/y <sup>2</sup>    |
| I                                         |                                                      | 0.024  | 0.8819               | 0.003         | 78.5541                 | -0.0059              | y <sup>2</sup>           |                     |
| II                                        | 1.45                                                 | 0.2670 | 0.172                | 16.8356       | 0.0038                  | none                 |                          |                     |
| Biomineralsation                          | BSi                                                  | 0      | 0.345                | 0.5754        |                         | 0.1694               | 0.0000                   | none                |
|                                           |                                                      | I      | 0.457                | 0.5208        | 0.061                   | 0.5058               | 0.0000                   | none                |
|                                           |                                                      | II     | 0.828                | 0.3927        | 0.106                   | 0.4056               | 0.0000                   | <sup>3</sup> √(y)   |
|                                           | PIC                                                  | 0      | 0.490                | 0.5063        |                         | 1.9852               | 0.0002                   | <sup>3</sup> √(y)   |
|                                           |                                                      | I      | 0.107                | 0.7530        | 0.015                   | 1.7730               | 0.0000                   | <sup>3</sup> √(y+5) |
|                                           | II                                                   | 0.135  | 0.7287               | 0.000         | 0.6581                  | 0.0001               | <sup>2</sup> √(y)        |                     |
|                                           | PIC:POC                                              | 0      | 0.465                | 0.5173        |                         | 0.0897               | 0.0000                   | log(y + 1)          |
|                                           |                                                      | I      | <b>7.32</b>          | <b>0.0304</b> | <b>0.511</b>            | <b>0.0012</b>        | <b>0.0001</b>            | <b>none</b>         |
|                                           | II                                                   | 1.13   | 0.3237               | 0.139         | 0.6655                  | 0.0000               | <sup>4</sup> √(y)        |                     |
|                                           | POC:BSi                                              | 0      | 0.982                | 0.3547        |                         | 0.0000               | 0.0000                   | 1/y <sup>3</sup>    |
| I                                         |                                                      | 0.009  | 0.9267               | 0.001         | 65.9248                 | -0.0007              | none                     |                     |
| II                                        | 1.997                                                | 0.2005 | 0.222                | 115.4953      | 0.0353                  | none                 |                          |                     |
| δ <sup>15</sup> N-PON                     | 0                                                    | 4.54   | 0.0707               | 0.393         | 20.6250                 | -0.0043              | y <sup>2</sup>           |                     |
|                                           | I                                                    | 0.580  | 0.4712               | 0.077         | 41760.69                | -8.9000              | 10 <sup>(y+1)</sup>      |                     |
|                                           | II                                                   | 0.416  | 0.5395               | 0.056         | 80.2658                 | -0.0183              | y <sup>3</sup>           |                     |

Table S2: Overview of carbonate system variables as mean  $\pm$  S.D. for each OAE treatment level for the experiment phases. “Short-term” refers to Days 7-19 (short-term response), and “longer term” refers to Days 21-33 with “Pre-treatment” corresponding to days prior to alkalinity addition.

|               |                                         | OAE                  |                      |                      |                      |                      |                      |                      |                      |                      |
|---------------|-----------------------------------------|----------------------|----------------------|----------------------|----------------------|----------------------|----------------------|----------------------|----------------------|----------------------|
|               |                                         | 0                    | 300                  | 600                  | 900                  | 1200                 | 1500                 | 1800                 | 2100                 | 2400                 |
| Phase         | Variable                                |                      |                      |                      |                      |                      |                      |                      |                      |                      |
| Pre-treatment | TA<br>( $\mu\text{mol kg}^{-1}$ )       | 2393.1 $\pm$<br>6.5  | 2395.0 $\pm$<br>3.5  | 2398.3 $\pm$<br>3.1  | 2398.1 $\pm$<br>1.2  | 2399.3 $\pm$<br>2.1  | 2399.4 $\pm$<br>2.6  | 2397.4 $\pm$<br>3.8  | 2400.3 $\pm$<br>3.5  | 2398.7 $\pm$<br>1.4  |
|               | DIC<br>( $\mu\text{mol kg}^{-1}$ )      | 2110.0 $\pm$<br>10.2 | 2107.9 $\pm$<br>5.7  | 2121.2 $\pm$<br>9.9  | 2114.5 $\pm$<br>5.1  | 2117.4 $\pm$<br>7.1  | 2115.3 $\pm$<br>5.1  | 2117.7 $\pm$<br>7.8  | 2113.1 $\pm$<br>7.3  | 2115.0 $\pm$<br>4.2  |
|               | pCO <sub>2</sub><br>( $\mu\text{atm}$ ) | 448 $\pm$ 11         | 441 $\pm$ 11         | 464 $\pm$ 18         | 449 $\pm$ 13         | 453 $\pm$ 15         | 449 $\pm$ 12         | 458 $\pm$ 14         | 443 $\pm$ 21         | 449 $\pm$ 7          |
|               | $\Omega_{\text{Ar}}$                    | 3.17 $\pm$<br>0.06   | 3.21 $\pm$<br>0.08   | 3.11 $\pm$<br>0.12   | 3.18 $\pm$<br>0.09   | 3.16 $\pm$<br>0.10   | 3.18 $\pm$<br>0.09   | 3.14 $\pm$<br>0.09   | 3.21 $\pm$<br>0.17   | 3.18 $\pm$<br>0.04   |
| Short term    | TA<br>( $\mu\text{mol kg}^{-1}$ )       | 2415.0 $\pm$<br>14.2 | 2693.4 $\pm$<br>9.5  | 2988.2 $\pm$<br>12.5 | 3282.7 $\pm$<br>9.2  | 3587.7 $\pm$<br>13.3 | 3865.8 $\pm$<br>18.5 | 4139.9 $\pm$<br>17.2 | 4439.2 $\pm$<br>17.8 | 4707.3 $\pm$<br>15.7 |
|               | DIC<br>( $\mu\text{mol kg}^{-1}$ )      | 2114.4 $\pm$<br>11.7 | 2344.4 $\pm$<br>12.7 | 2588.1 $\pm$<br>17.1 | 2830.6 $\pm$<br>20.3 | 3076.4 $\pm$<br>20.3 | 3296.5 $\pm$<br>29.6 | 3508.1 $\pm$<br>31-0 | 3743.6 $\pm$<br>25.2 | 3951.3 $\pm$<br>27.3 |
|               | pCO <sub>2</sub><br>( $\mu\text{atm}$ ) | 421 $\pm$ 11         | 426 $\pm$ 16         | 435 $\pm$ 17         | 445 $\pm$ 23         | 448 $\pm$ 18         | 449 $\pm$ 27         | 444 $\pm$ 24         | 446 $\pm$ 15         | 447 $\pm$ 17         |
|               | $\Omega_{\text{Ar}}$                    | 3.35 $\pm$<br>0.07   | 4.00 $\pm$<br>0.09   | 4.71 $\pm$<br>0.11   | 5.44 $\pm$<br>0.16   | 6.27 $\pm$<br>0.14   | 7.08 $\pm$<br>0.23   | 7.96 $\pm$<br>0.22   | 8.88 $\pm$<br>0.14   | 9.74 $\pm$<br>0.15   |
| Longer term   | TA<br>( $\mu\text{mol kg}^{-1}$ )       | 2440.3 $\pm$<br>5.6  | 2699.8 $\pm$<br>55.2 | 3017.3 $\pm$<br>33.8 | 3310.3 $\pm$<br>10.7 | 3618.0 $\pm$<br>30.7 | 3895.6 $\pm$<br>35.6 | 4174.0 $\pm$<br>42.9 | 4469.3 $\pm$<br>29.5 | 4615.8 $\pm$<br>92.2 |
|               | DIC<br>( $\mu\text{mol kg}^{-1}$ )      | 2124.1 $\pm$<br>12.5 | 2352.0 $\pm$<br>12.3 | 2598.3 $\pm$<br>19.1 | 2829.1 $\pm$<br>16.2 | 3082.4 $\pm$<br>19.0 | 3294.9 $\pm$<br>24.0 | 3502.9 $\pm$<br>25.8 | 3754.0 $\pm$<br>30.1 | 3892.2 $\pm$<br>52.2 |
|               | pCO <sub>2</sub><br>( $\mu\text{atm}$ ) | 412 $\pm$ 8          | 443 $\pm$ 86         | 419 $\pm$ 29         | 415 $\pm$ 29         | 428 $\pm$ 19         | 422 $\pm$ 35         | 417 $\pm$ 32         | 436 $\pm$ 30         | 464 $\pm$ 40         |
|               | $\Omega_{\text{Ar}}$                    | 3.47 $\pm$<br>0.05   | 3.98 $\pm$<br>0.50   | 4.91 $\pm$<br>0.28   | 5.76 $\pm$<br>0.26   | 6.54 $\pm$<br>0.24   | 7.44 $\pm$<br>0.43   | 8.37 $\pm$<br>0.46   | 9.10 $\pm$<br>0.36   | 9.28 $\pm$<br>0.67   |

Table S3: Overview of experiment information for unpublished data sets included in Fig. 8. For KOSMOS2016 and KOSMOS2017, pH was calculated on the total scale from measured TA and DIC using CO2SYS as described in the methods. NO<sub>x</sub> was determined spectrophotometrically and Chlorophyll a fluorometrically.

| <b>Experiment name</b>   | <b>Location</b>                 | <b>Experiment description</b>                                                                              | <b>Mesocosms/time period selected</b>                                                                                           |
|--------------------------|---------------------------------|------------------------------------------------------------------------------------------------------------|---------------------------------------------------------------------------------------------------------------------------------|
| KOSMOS2014 (published)   | Gran Canaria (Gando Bay)        | Ocean acidification with simulated upwelling of deep water. See Taucher et al. (2018) for more information | All mesocosms on all sampling days before deep water addition (Day 27). [NO <sub>x</sub> ] < 0.20 μM                            |
| KOSMOS2016 (unpublished) | Gran Canaria (Taliarte Harbour) | Ocean acidification with simulated upwelling of deep water.                                                | All mesocosms on all sampling days before deep water addition (Day 19). [NO <sub>x</sub> ] < 0.20 μM                            |
| KOSMOS2017 (unpublished) | Gran Canaria (Taliarte Harbour) | Ocean artificial upwelling simulated upwelling of deep water.                                              | Only controls mesocosms (M1, M6 - no nutrient addition) on all sampling days (Days 1-29) included. [NO <sub>x</sub> ] < 0.12 μM |
| KOSMOS2021 (this study)  | Gran Canaria (Taliarte Harbour) | Ocean Alkalinity Enhancement                                                                               | All mesocosms on all sampling days included. [NO <sub>x</sub> ] < 0.10 μM                                                       |

Fig. S1: Photo showing two deployed mesocosms with the lids open at the pier in Taliarte Harbour, Gran Canaria, Spain (A) and an underwater photo showing the deployed mesocosms and the attached sediment trap (B).

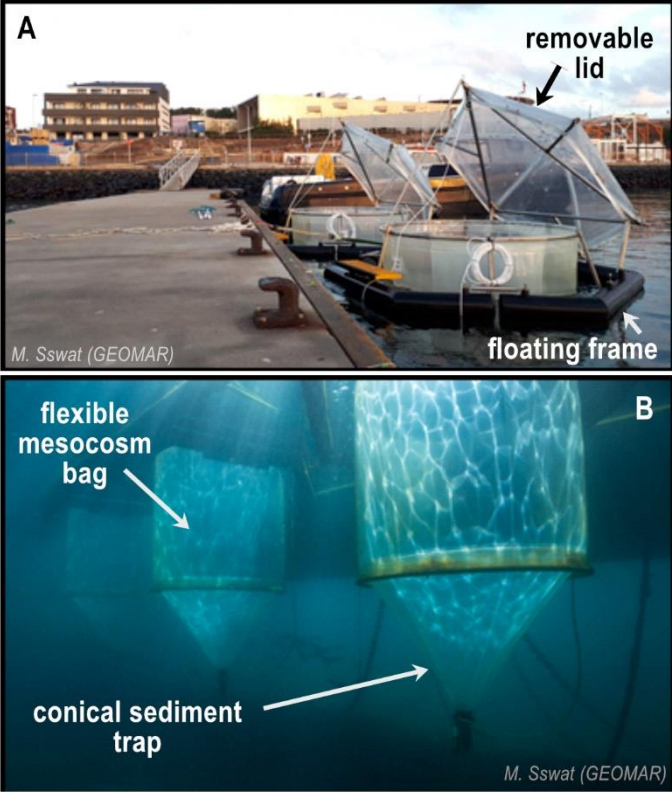

Fig. S2: Photo of white particles attached to mesocosm walls in OAE2400 on Day 28.

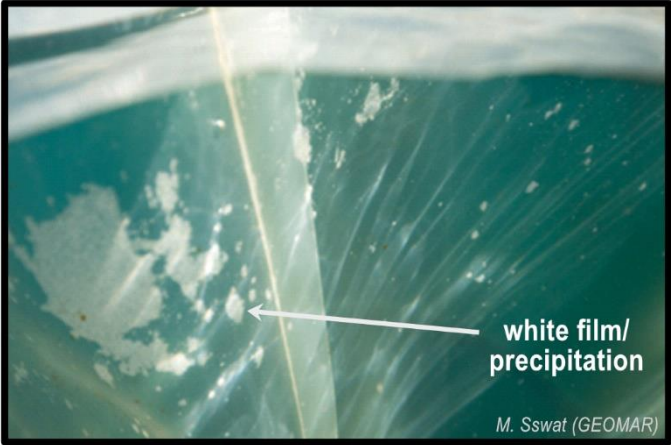

Fig. S3: Analysis of two mesocosm wall precipitates (samples A/B) by FTIR (Bruker Vertex 70 FTIR, University of Hamburg) against a pure anhydrous aragonite reference material, and a calcite reference. Overlap of the sample peaks at with the aragonite standard at  $854\text{ cm}^{-1}$ ,  $1083\text{ cm}^{-1}$  and  $1424\text{-}1474\text{ cm}^{-1}$  confirm aragonite as the primary crystal polymorph in the mesocosm particles (Chakrabarty and Mahapatra, 1999; Jovanovski et al., 2002). Peaks around  $3500\text{ cm}^{-1}$  are water ( $\text{H}_2\text{O}$ ).

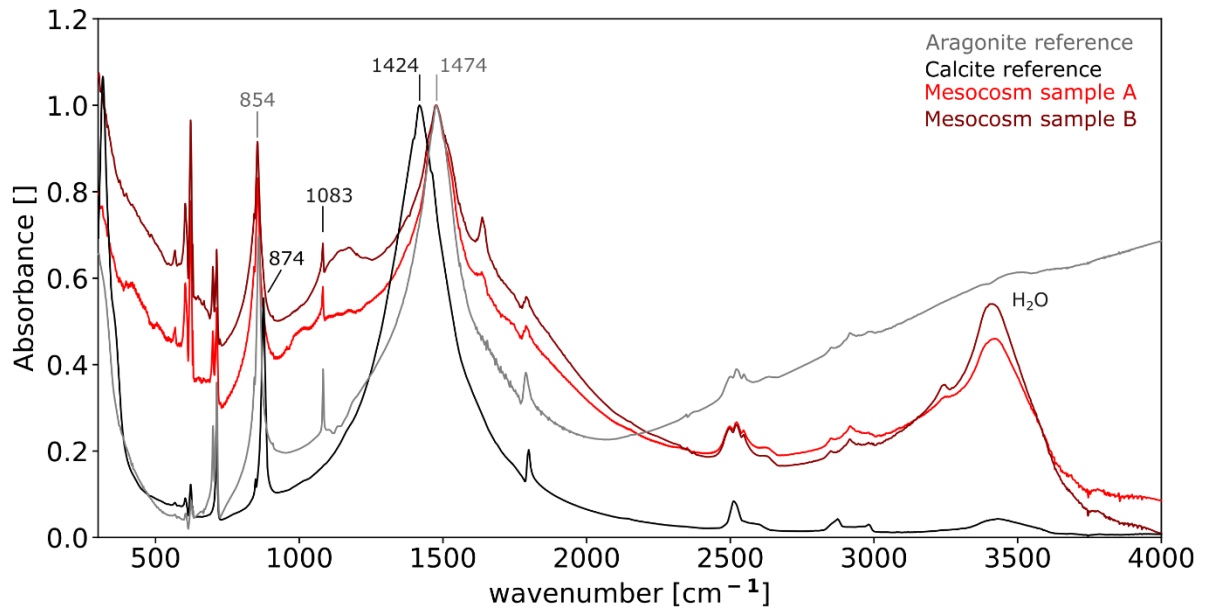

Fig. S4: Measured change in alkalinity (TA) and aragonite saturation state ( $\Omega_{ar}$ ) for up to 150 days after the end of the incubation experiment. Dashed lines refer “fresh” seawater with solid lines for mesocosm water. Error bars indicate the standard deviation of treatment duplicates. Sampling was continued in Gran Canaria until Day 45. Thereafter the bottles were sealed and transported by container back to Hamburg where sampling and analysis was continued on Day 81, 125, 195. These incubations were not temperature controlled so there is some uncertainty in the pH correction applied (Badocco et al., 2021) that was used to calculate saturation states for aragonite ( $\Omega_{ar}$ ). Hence, the  $\Omega_{ar}$  values have a higher uncertainty associated with them but the general trends over time are considered representative of changes over time.

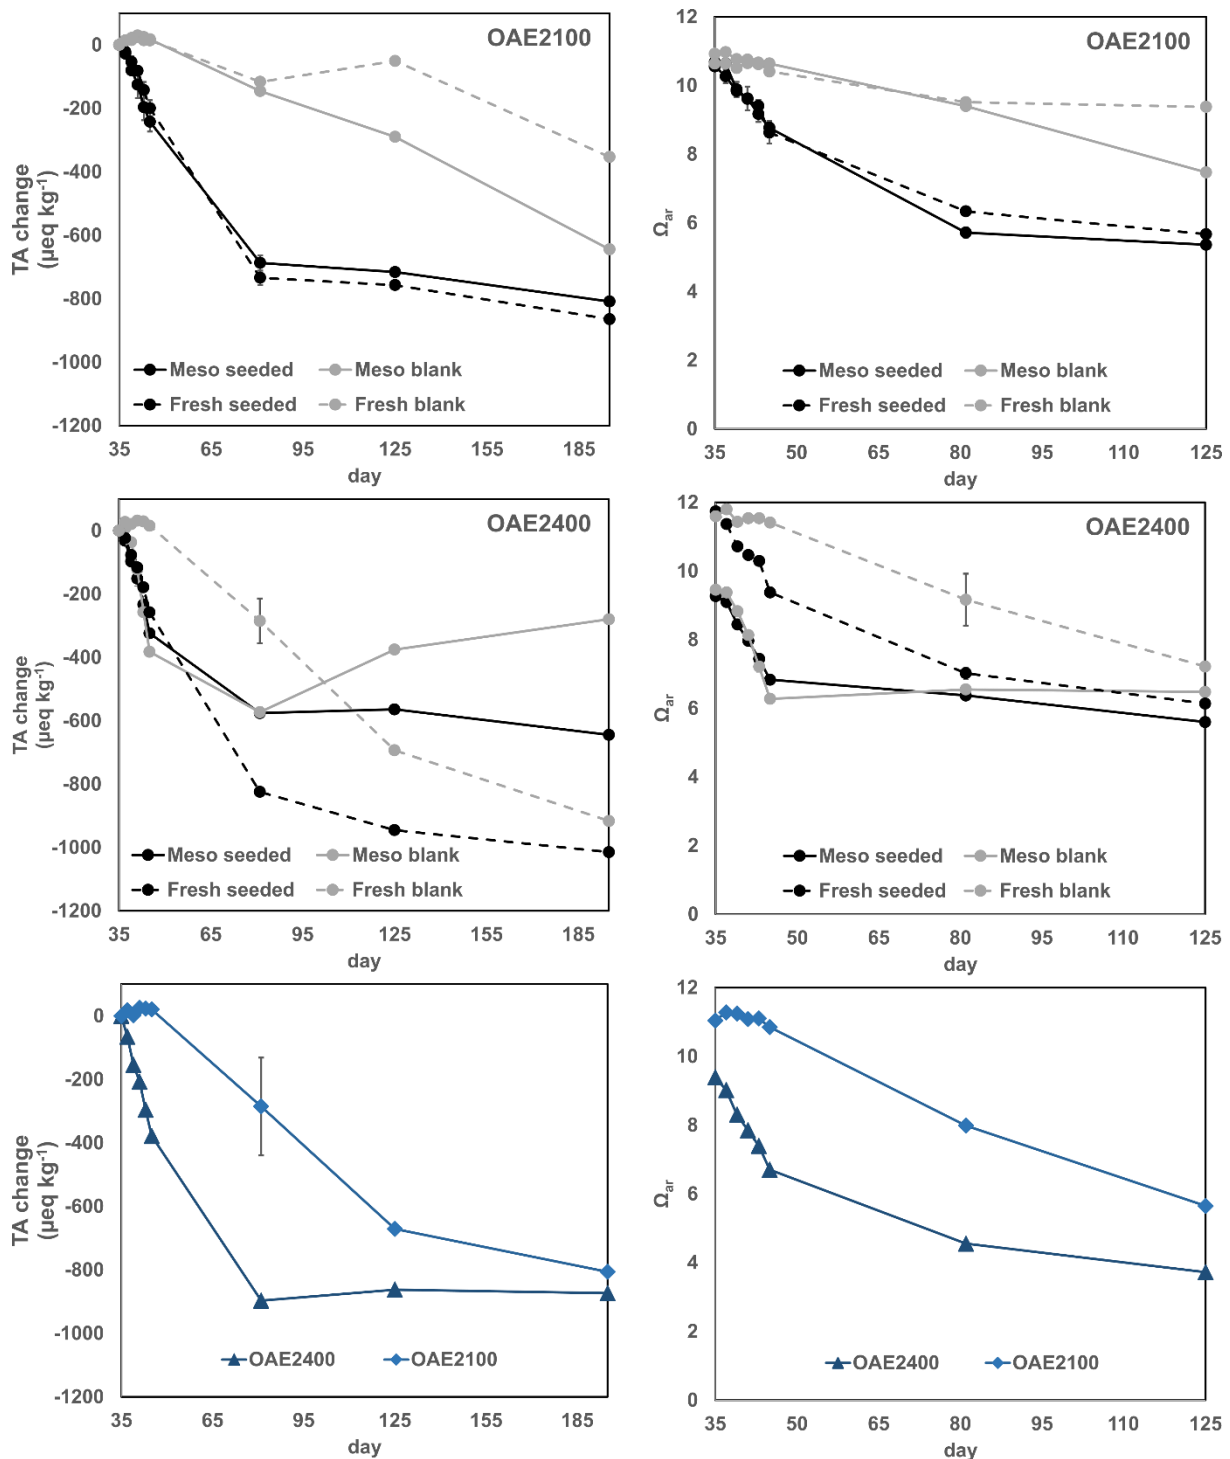

Supplement: Supplementary file 1 [file egusphere-2024-417-supplement.pdf]
